# Supplementary material for: Turn-on silicon-based fluorescent probe for visualizing endogenous CO during hypoxia
Source: Royal Society of Chemistry journal article supplement (doi:10.1039/d2nj01696f), 2022-01-01
Supplement: d2nj01696f1.pdf [file d2nj01696f1.pdf]

*Electronic Supplementary Information for*

## **Turn-on silicon-based fluorescent probe for visualizing endogenous CO during hypoxia**

Fengqing Gai<sup>a</sup>, Xuewen Guo<sup>b</sup>, Guowei Ding<sup>a</sup>, Kun Zhang<sup>a</sup>, Yafang Zhang<sup>a</sup>, and Yujing Zuo<sup>a,\*</sup>

<sup>a</sup>School of Chemistry and Chemical Engineering, School of Materials Science and Engineering, University of Jinan, Shandong 250022, P.R. China.

<sup>b</sup>Leibniz-Institut für Katalyse e. V., Albert-Einstein-Straße 29a, D-18059 Rostock, Germany

## Table of Contents

|                                 |    |
|---------------------------------|----|
| Materials and instruments ..... | S3 |
| Cytotoxicity Assays .....       | S3 |
| Fig. S1 .....                   | S4 |
| Fig. S2 .....                   | S4 |
| Fig. S3 .....                   | S5 |
| Fig. S4 .....                   | S5 |
| Fig. S5 .....                   | S6 |
| Fig. S6 .....                   | S6 |
| Fig. S7 .....                   | S7 |
| Table S1 .....                  | S7 |

## Materials and instruments

All chemicals and solvents used in the experiment were of analytical grade and were used without further purification. 3, 3'-(1, 1, 3, 3-tetramethyldisiloxane-1, 3-diyl) bis (Propan-1-amine) purchased from Hangzhou Da di Chemical. 3-Nitro-1, 8-naphthalic anhydride was purchased from Shanghai Aladdia Biochemical Technology Co., Ltd. HepG2 cells lines were purchased from Procell Life Science&Technology Co., Ltd. The other reagents used in this work were purchased from the supplier, and the water used in the experiment was ultrapure water.

The  $^1\text{H}$  NMR and  $^{13}\text{C}$  NMR spectra were measured on an AVANCE III 400 MHz Digital NMR Spectrometer. Fluorescence spectra were recorded with a HITACHI F4600 fluorescence spectrophotometer with a 1 cm standard quartz cell. Absorption spectra were obtained on a Shimadzu UV-2700 Power spectrometer. MTT was obtained from Sigma-Aldrich. Fluorescence imaging of HepG2 cells was performed with Nikon A1MP confocal microscopy. The pH measurements were carried out on a Mettler-Toledo Delta 320 pH meter.

## Cytotoxicity Assays

The cytotoxicity of **SAH-N** was performed via the standard MTT assays. HepG2 cells were first inoculated in culture plate until they adhered to the walls. Subsequently, the culture media with different concentrations of **SAH-N** were added to the 96-well plate and cultured in an incubator (5%  $\text{CO}_2$  and 95% air, 37 °C) for 24 h. MTT (10  $\mu\text{L}$ ) was added and the cells were continue cultured for 4 h. Finally, the plate was shaken for about 10 min, and each well was analyzed by the microplate reader and detected at the absorbance of 570 nm.

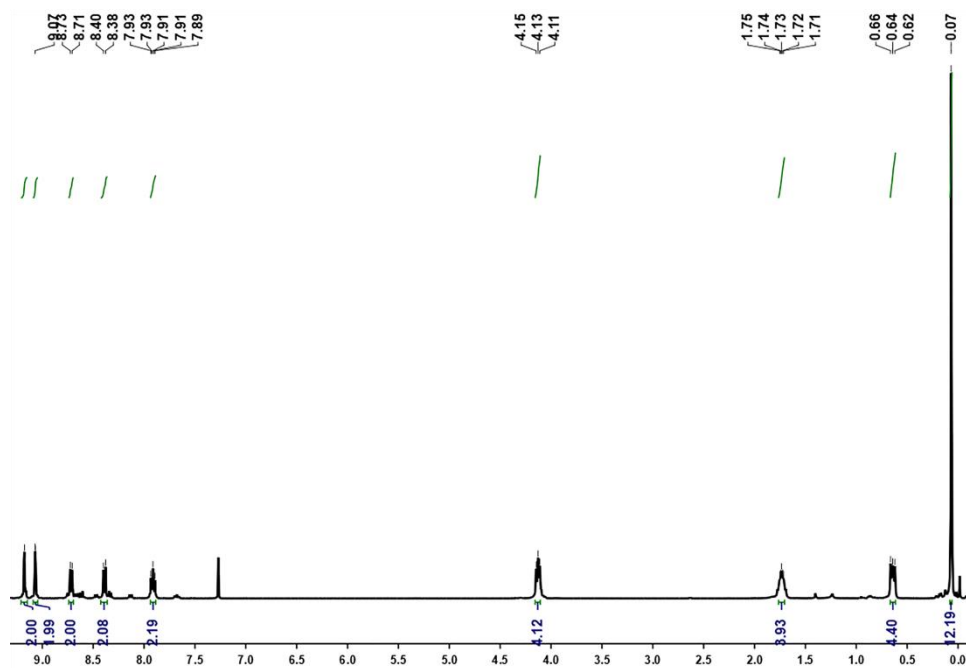

**Fig. S1.** The  $^1\text{H}$  NMR spectrum of SAH-N.

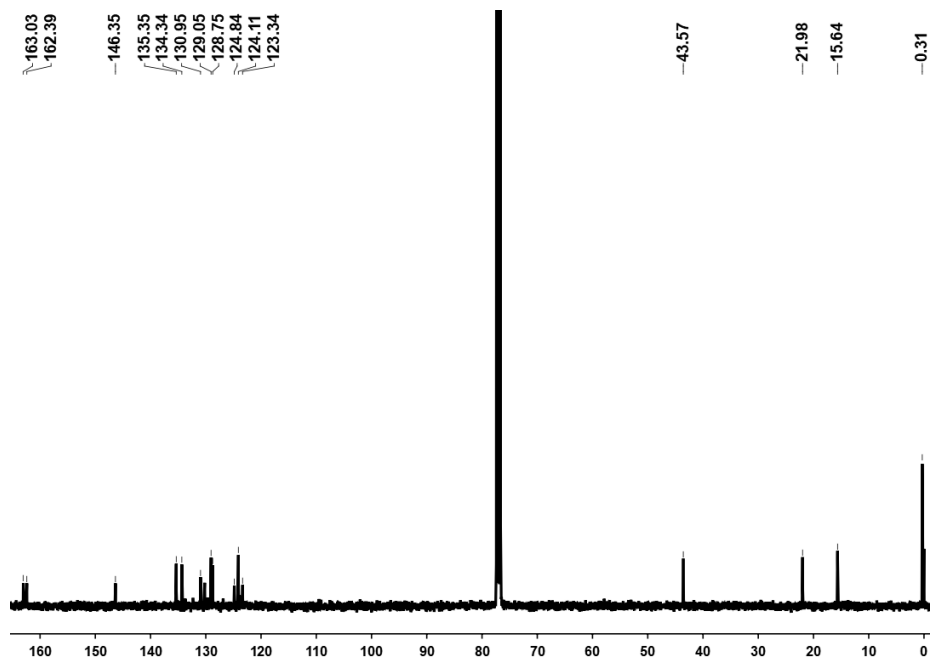

**Fig. S2.** The  $^{13}\text{C}$  NMR spectrum of SAH-N.

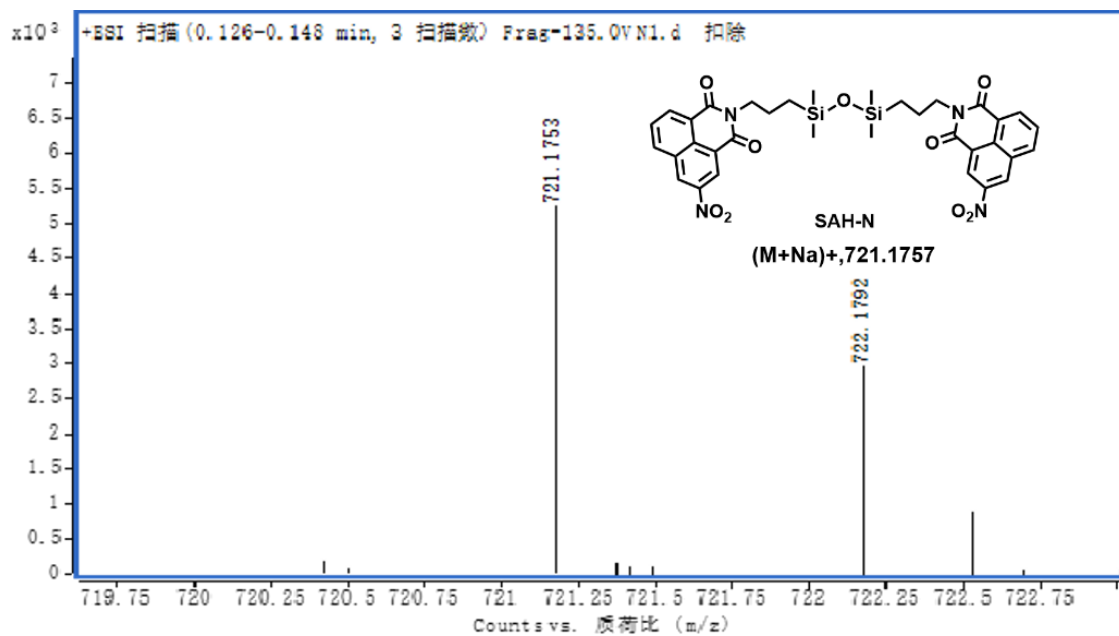

Fig. S3. The HR-MS spectrum of SAH-N.

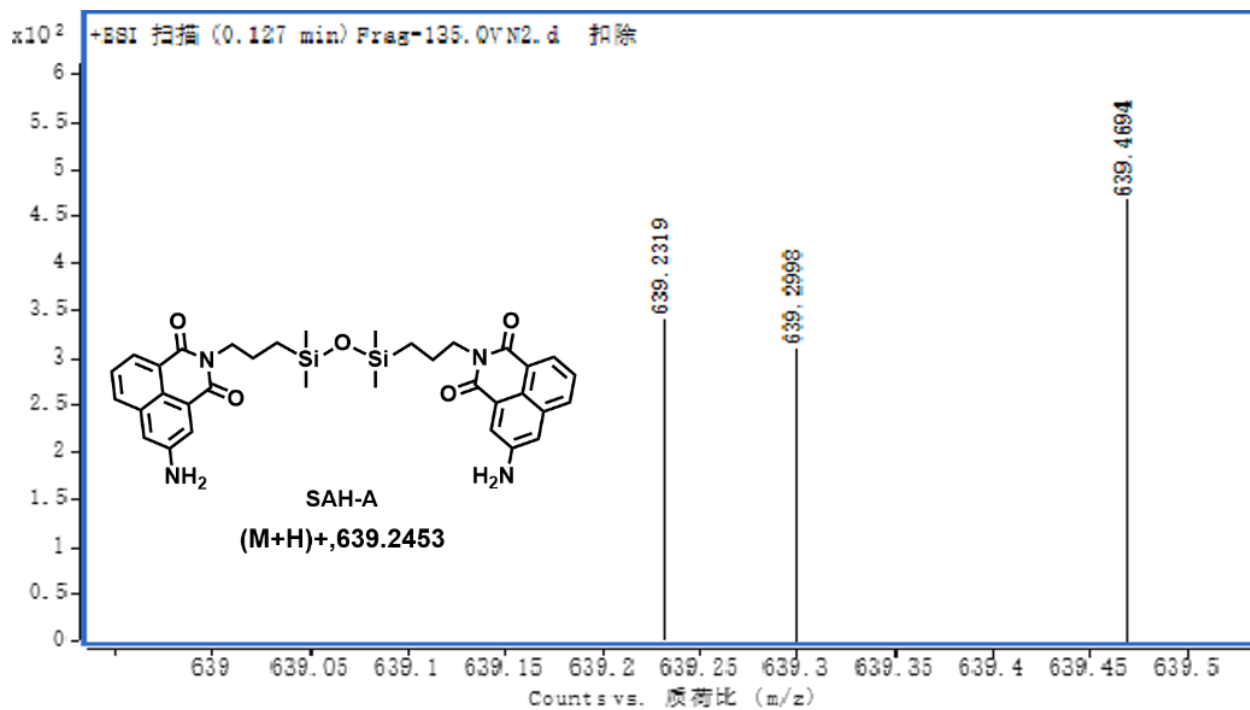

Fig. S4. The HR-MS spectrum of SAH-N reacted with CORM-2.

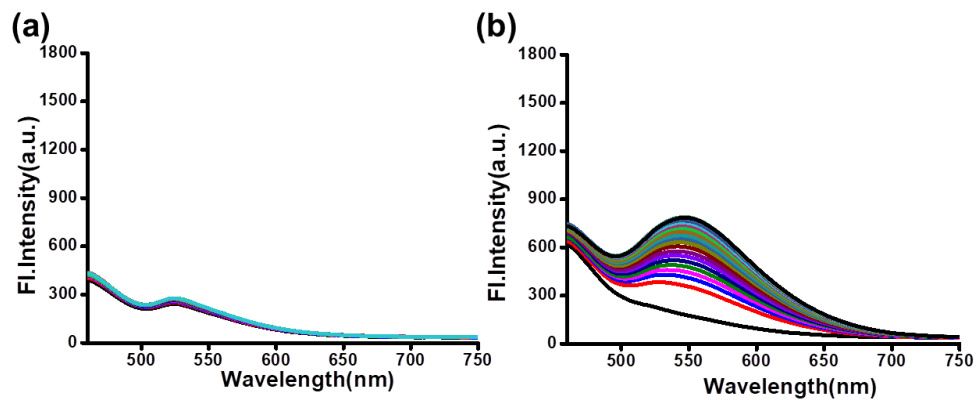

**Fig. S5.** (a) Fluorescence spectra of **SAH-N** (10 μM) for 60 min. (b) Fluorescence spectra of **SAH-N** (10 μM) treated with 30 μM **CORM-2** for 60 min.  $\lambda_{\text{ex}} = 440$  nm.

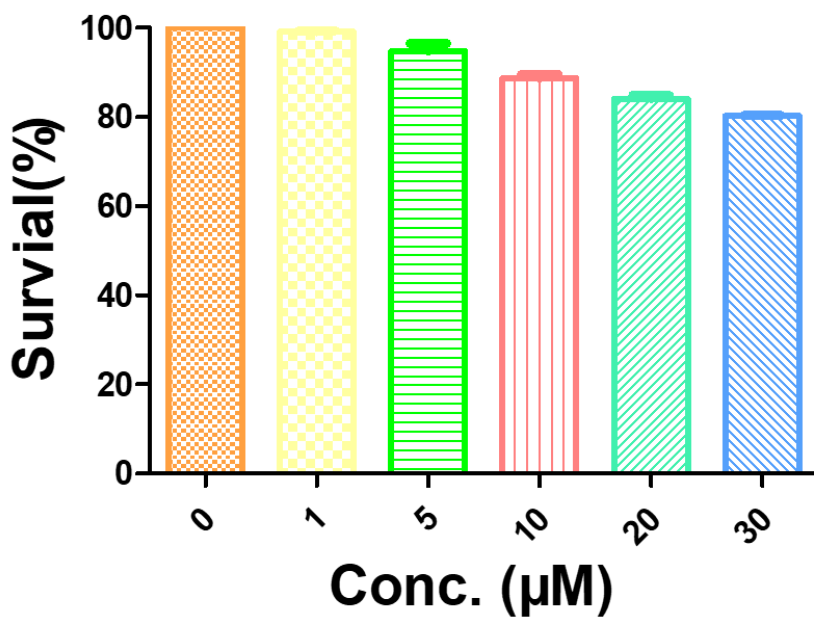

**Fig. S6.** HepG2 cells in the presence of **SAH-N** at various concentrations measured using MTT assay.

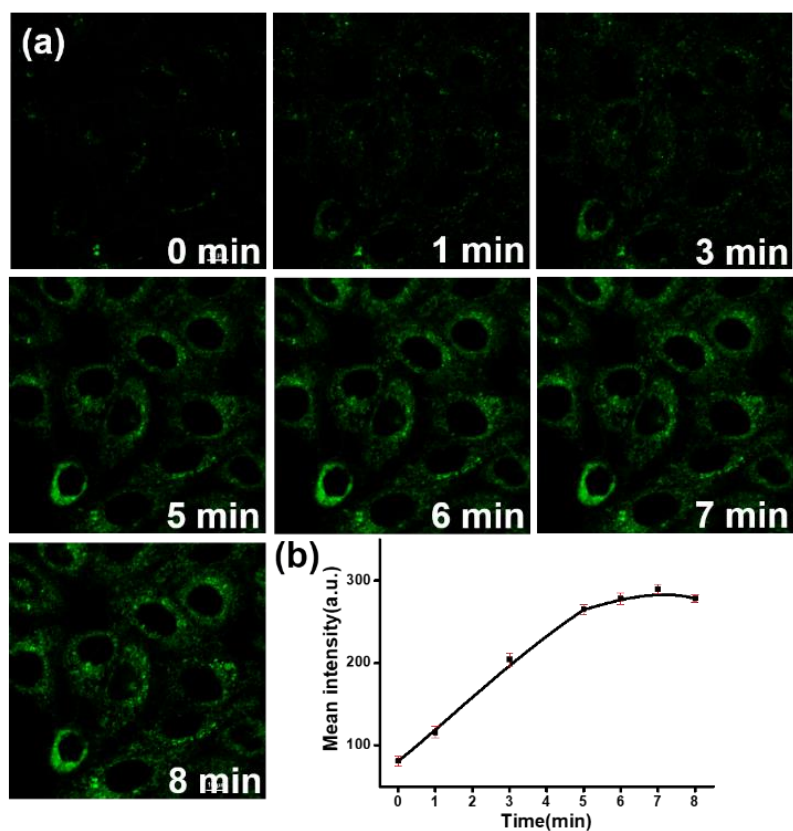

**Fig. S7.** (a) Fluorescent images of of HepG2 cells stained with 10  $\mu\text{M}$  SAH-N with increasing incubation times. (b) Fluorescence intensity changes of the photos of cells in green channel. CORM-2 concentration: 30  $\mu\text{M}$ ;  $\lambda_{\text{ex}}$ : 488 nm;  $\lambda_{\text{em}}$ : 500 nm – 550 nm; scale bar: 10 $\mu\text{M}$ .

**Table S1.** Additional table of comparison between reported CO probes and probe SAH-N.

| Probe | $\lambda_{\text{em}}$<br>(nm) | $\lambda_{\text{ex}}$ (nm) | Pd <sup>2+</sup><br>free | Reaction<br>site | Endogenous<br>experiment | Ref. |
|-------|-------------------------------|----------------------------|--------------------------|------------------|--------------------------|------|
|       |                               |                            |                          |                  |                          |      |

|                                                                                     |     |         |    |            |         |    |
|-------------------------------------------------------------------------------------|-----|---------|----|------------|---------|----|
| 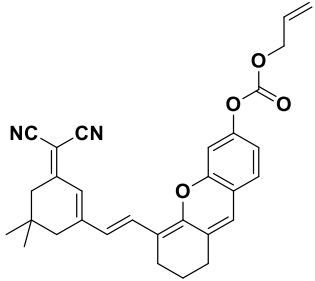   | 580 | 770     | No | Ester bond | Heme    | 36 |
|    | 430 | 549/451 | No | Ether bond | LPS     | 37 |
|   | 520 | 605     | No | Ester bond | Heme    | 38 |
|  | 330 | 552/440 | No | Ester bond | Hypoxia | 39 |
|  | 471 | 608     | No | Ester bond | ---     | 40 |



|                                                                                                  |     |         |     |               |                |                                       |
|--------------------------------------------------------------------------------------------------|-----|---------|-----|---------------|----------------|---------------------------------------|
| 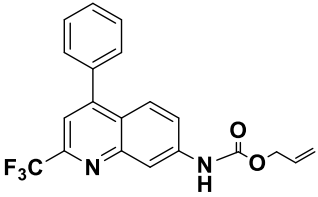                | 360 | 520/425 | No  | Urethane bond | Heme/LPS       | 41                                    |
|  <p>PMAH-CO</p> | 425 | 559/450 | No  | Ether bond    | ---            | Anal. Chem. 2021, 93, 38, 12899–12905 |
|                | 440 | 537     | Yes | Nitro         | Mainly hypoxia | This work                             |
